# Supplementary material
Source: publisher site journal article supplement (https://www.dovepress.com/article/300342)
Supplement: Supplementary file 1 [file get_supplementary_file.php]

**Supplementary information**

**Exclusion criteria**

Exclusion criteria included the following contraindications for the use of phentermine or orlistat (Supplementary information). progressive atherosclerosis, symptomatic CVD, pulmonary hypertension, valvular heart diseases, BP >180/120 mmHg, hyperthyroidism, glaucoma, fasting glucose level of 11.1 mmol/L, hepatic disease, cholelithiasis, malabsorption diseases, renal diseases, history of psychiatric illness, taking medications such as monoamine oxidase inhibitors within 14 days of screening, pregnancy, breastfeeding, loss of >5 kg within 3 months, and treatment with other anti-obesity medication within 1 year.

**Supplementary Table 1.** Changes in lipids, flow-mediated dilatation, and nitroglycerin-mediated dilatation from baseline to 12 weeks in the placebo/phentermine and orlistat/phentermine group in per protocol set (n=96)

|  | **Placebo/phentermine** | | | **Orlistat/phentermine** | | | |
| --- | --- | --- | --- | --- | --- | --- | --- |
|  | **Baseline** | **12 weeks** | **changes** | **Baseline** | **12 weeks** | **changes** | **P-value†** |
| **Lipids** |  |  |  |  |  |  |  |
| Triglyceride | 1.53 (1.03, 2.00) | 1.09 (0.90, 1.36)* | -0.48 ± 0.08 | 1.36 (0.98, 1.67) | 1.14 (0.83, 1.49)* | -0.43 ± 0.08 | NS |
| Total cholesterol | 5.27 ± 1.06 | 4.82 ± 0.94* | -0.41 ± 0.08 | 5.05 ± 0.94 | 4.39 ±0.71** | -0.70 ± 0.76 | 0.01 |
| LDL cholesterol | 3.36 ± 0.8 | 3.05 ± 0.73* | -0.26 ± 0.06 | 3.08 ± 0.65 | 2.72 ± 0.55** | -0.41 ± 0.06 | 0.07 |
| HDL cholesterol | 1.34 ± 0.24 | 1.32 ± 0.26 | -0.03 ± 0.02 | 1.37 ± 0.35 | 1.26 ± 0.26** | -0.10 ± 0.02 | 0.01 |
| Non-HDL-cholesterol | 3.92 ± 1.04 | 3.50 ±0.90** | -0.37 ± 0.07 | 3.65 ±0.93 | 3.10 ±0.67** | -0.60 ± 0.07 | 0.03 |
| **Endothelial cell function** |  |  |  |  |  |  |  |
| **FMD (%)** | 11.6 ± 5.5 | 13.8 ± 6.6 | 2.12 ± 1.19 | 10.6 ± 6.3 | 16.5 ± 8.3 | 6.02 ± 1.14 | 0.02 |
| **NMD (%)** | 12.7 ± 6.3 | 14.3 ± 6.0 | 1.59 ± 1.07 | 11.0 ± 5.5 | 13.0 ± 6.3 | 2.27 ± 1.02 | NS |

*p-values<0.05, **p-value <0.01, NS, not significant

†p-value; differences of changes between two groups calculated using an analysis of covariance after adjusting for each baseline values

**Supplementary Table 2** Adverse events in the placebo/phentermine and orlistat/phentermine groups

The most common adverse event reported in the placebo/phentermine group was insomnia (12.5%), followed by dry mouth (7.1%), depressive mood (3.6%), and heart palpitation (3.6%). Other infrequently reported adverse events in this group were constipation, headache, and impotence (1.8% each). The most common adverse events reported in the orlistat/phentermine group were insomnia (8.8%) and steatorrhea (8.8%), followed by constipation (5.3%), nervousness (3.5%), and diarrhea (3.5%). Depressive mood, nausea, dry mouth, dizziness, headaches, and impotence were each reported once (1.8% each) in this group. Adverse events reported in the orlistat/phentermine group were more frequently related to GI tract disturbances (steatorrhea). Adverse events related to phentermine were similar between the groups, transiently occurred, and were mostly mild to moderate in severity.

|  | **Total**  **(n=112)** | **Placebo/phentermine (n=55)** | **Orlistat/phentermine (n=57)** | **p-value** |
| --- | --- | --- | --- | --- |
| Adverse events, n (%) | 41(36.3) | 18 (32.1) | 23 (40.4) | 0.36 |
| Insomnia | 12 (10.6) | 7 (12.5) | 5 (8.8) | 0.52 |
| Steatorrhea | 5 (4.4) | 0 | 5 (8.8) | 0.02 |
| Constipation | 4 (3.5) | 1 (1.8) | 3 (5.3) | 0.32 |
| Dry mouth | 5 (4.4) | 4 (7.1) | 1 (1.8) | 0.16 |
| Nervousness | 2 (1.8) | 0 | 2 (3.5) | 0.08 |
| Depressive mood | 3 (2.7) | 2 (3.6) | 1 (1.8) | 0.55 |
| Nausea | 1 (0.9) | 0 | 1 (1.8) | 0.31 |
| Diarrhea | 2 (1.8) | 0 | 2 (3.5) | 0.16 |
| Palpitations | 2 (1.7) | 2 (3.6) | 0 | 0.15 |
| Dizziness | 1 (0.9) | 0 | 1 (1.8) | 0.31 |
| Headache | 2 (1.8) | 1 (1.8) | 1 (1.8) | 0.89 |
| Impotence | 2 (1.8) | 1 (1.8) | 1 (1.8) | 0.89 |

**Supplementary Table 3.** Characteristics of transthoracic echocardiography in the placebo/phentermine and orlistat/phentermine groups at baseline and 12 weeks

One volunteer was incidentally diagnosed with atrial septal defect during screening and was unable to participate in the study. No other findings on transthoracic echocardiography and no cases of increased right ventricular systolic pressure were found. In both groups, the left ventricular diastolic function measured using the E/E ratio was significantly improved with no significant difference between the groups.

|  | **Placebo/phentermine** | | | **Orlistat/phentermine** | | | |
| --- | --- | --- | --- | --- | --- | --- | --- |
|  | **Baseline** | **12 weeks** | **changes** | **Baseline** | **12 weeks** | **changes** | **P-value†** |
| LVEF, % | 62.2 ± 4.7 | 63.0 ± 4.1 | 0.63 ±0.64 | 62.6 ± 5.8 | 62.3 ± 5.4 | -0.11 ± 0.64 | NS |
| E wave velocity, cm/s | 0.52 ± 0.13 | 0.49 ± 0.13* | -0.03 ± 0.01 | 0.51 ± 0.14 | 0.48 ± 0.13* | -0.04 ± 0.01 | NS |
| A wave velocity, cm/s | 0.57 ± 0.11 | 0.56 ± 0.11 | -0.02 ± 0.01 | 0.56 ± 0.12 | 0.54 ± 0.11 | -0.02 ± 0.01 | NS |
| E/A | 0.86 (0.72, 1.14) | 0.75 (0.61,1.14)** | -0.001 ±0.078 | 0.89 (0.71, 1.17) | 0.71 (0.55,1.67)** | -0.112 ± 0.078 | NS |
| E wave Decel time, ms | 150 (150, 180) | 150 (150, 179) | -2.23 ± 3.80 | 150 (150, 175) | 150 (150, 176) | 0.07 ± 3.79 | NS |
| E’ | 0.06 (0.05, 0.08) | 0.06 (0.05, 0.08) | 0.001 ± 0.002 | 0.06 (0.05, 0.07) | 0.06 (0.05, 0.08) | 0.001 ± 0.002 | NS |
| E/E’ | 8.32 ±1.74 | 7.76 ± 1.66** | -0.54 ± 0.21 | 8.22 ± 1.79 | 7.77 ± 2.10* | -0.47 ± 0.21 | NS |
| LAVI | 16.7 ± 4.2 | 16.1 ± 4.8 | -0.84 ± 0.44 | 18.2 ± 4.9 | 16.6 ± 3.9** | -1.33 ± 0.36 | NS |
| LVEDD, mm | 45.7 ± 3.7 | 45.2 ± 3.9 | -0.51 ± 0.37 | 45.8 ± 3.9 | 44.8 ± 4.1* | -0.96 ± 0.36 | NS |
| LVESD, mm | 31.5 ± 2.9 | 31.0 ± 3.0 | -0.48 ± 0.27 | 31.4 ± 3.1 | 30.9 ± 3.3 | -0.52 ± 0.26 | NS |
| RVSP | 26.2 ± 4.3 | 25.6 ± 4.1 | -0.61 ± 0.44 | 26.2 ± 3.1 | 25.3 ± 3.0 | -0.92 ± 0.44 | NS |

LVEF, left ventricle ejection fraction; E, early ventricular filling velocities; A, late ventricular filling velocities; E/A, early diastolic mitral inflow velocity/late diastolic mitral inflow velocity; DT, deceleration time; E’; LVEDD, E/E', early diastolic mitral inflow velocity/early diastolic mitral annular tissue velocity; left ventricular end-diastolic pressure; LVESD, left ventricular end-diastolic diameter; LVESD, left ventricular end-systolic diameter; RVSP, right ventricular systolic pressure

*p-values<0.05, **p-value <0.01, NS, not significant

†p-value; differences of changes between two groups calculated using an analysis of covariance after adjusting for each baseline values
